# Supplementary material for: Assessing Moral Judgements in Veterinary Students: An Exploratory Mixed-Methods Study from Germany
Source: MDPI journal article supplement (doi:10.3390/ani12050586), 2022-02-25
Supplement: s1 [file s1]

## „Was denken Sie?“ – Ethische Urteile in der Tiermedizin

Liebe Studierende,

im Rahmen des vom Bundesministerium für Bildung und Forschung finanzierten Projektes FERTHIK II führt die AG Angewandte Ethik in der Tiermedizin eine Studie zu ethischen Urteilen bei Studierenden der Tiermedizin durch.

Ihr Jahrgang wurde für diese Studie ausgewählt und wir sind darauf angewiesen, dass Sie sich möglichst vollzählig beteiligen, um aussagekräftige Ergebnisse zu erzielen.

Im Folgenden werden Sie gebeten, sich vier fiktive Fälle aus dem tierärztlichen Praxisalltag durchzulesen und dazu Stellung zu nehmen. Bitte lesen Sie die Texte sorgfältig durch, damit Ihnen keine wichtigen Informationen entgehen.

Bitte beantworten Sie die Fragen in der vorgegebenen Reihenfolge - ein Zurückwechseln zu bearbeiteten Aufgaben ist nicht möglich. Bitte antworten Sie in freien Textfeldern in Stichpunkten! Die Bearbeitung der Umfrage wird ca. 30 Minuten in Anspruch nehmen. Nun geht es los...

In dieser Umfrage sind 23 Fragen enthalten.

### *Fall 1*

Tierärztin Frau Dr. Huf-Schmidt wird zu einem kleineren Milchviehbetrieb gerufen, wo sie eine Kuh mit schwerer Mastitis behandeln soll. Das Tier hat Fieber und die Milchbildung ist stark zurückgegangen. Frau Huf-Schmidt sieht auf dem Hof weitere Kühe, die stark husten. Der Landwirt sagt, das sei halt das Wetter. Sie solle lediglich der einen Kuh wieder zur üblichen Milchleistung verhelfen. Unter den aktuellen ökonomischen Zwängen könne er nicht für jedes Wehwehchen eine tierärztliche Behandlung veranlassen.

1. Wer ist an dem Konflikt beteiligt (Stakeholders)?
2. Inwiefern liegen in diesem Fall ethische Konflikte vor?
3. Welche Informationen sind wichtig für eine Entscheidung? Benötigen Sie weitere Informationen?
4. Wie sollte Frau Dr. Huf-Schmidt weiter vorgehen? Begründen Sie!

### *Fall 2*

Eine Frau kommt mit ihrer 8-jährigen Tochter und deren Meerschweinchen in die Tierklinik. Das Tier leidet an einer behandelbaren Krankheit, aber die zeitaufwändige

Therapie würde etwa 200€ kosten. Die Frau sagt, sie möchte die Kosten nicht übernehmen, und bittet darum, das Tier zu euthanasieren. Sie will ihrer Tochter für 25€ ein neues Meerschweinchen kaufen. Die Tochter ist sichtlich aufgelöst. Das Meerschweinchen leidet an starken Schmerzen und es besteht akuter Handlungsbedarf.

1. Wer ist an dem Konflikt beteiligt (Stakeholders)?
2. Inwiefern liegen in diesem Fall ethische Konflikte vor?
3. Welche Informationen sind wichtig für eine Entscheidung? Benötigen Sie weitere Informationen?
4. Wie würden Sie als Tierärztin/Tierarzt entscheiden? Begründen Sie!

### *Fall 3*

Tierarzt Dr. Knecht-Weber wird zu einem Springpferd gerufen, das am linken Vorderbein lahmt. Nach eingehender Untersuchung ordnet er eine Behandlung und Schonung an. Der Besitzer erklärt, dass das Pferd in zwei Tagen bei einem Wettkampf antreten soll, und fordert ihn auf, die Lahmheit mit der Gabe eines Analgetikums zu unterdrücken. Auf den Hinweis, dass eine Wettkampfbelastung unter diesen Bedingungen zu einem bleibenden Sehnenschaden führen könnte, entgegnet er, das Pferd habe eine gute Lebensversicherung.

1. Wer ist an dem Konflikt beteiligt (Stakeholders)?
2. Inwiefern liegen in diesem Fall ethische Konflikte vor?
3. Welche Informationen sind wichtig für eine Entscheidung? Benötigen Sie weitere Informationen?
4. Wie sollte Herr Dr. Knecht-Weber entscheiden? Begründen Sie!

### *Skalen Fall 1*

Denken Sie an den ersten Fall zurück:

Tierärztin Frau Dr. Huf-Schmidt wird zu einem kleineren Milchviehbetrieb gerufen, wo sie eine Kuh mit schwerer Mastitis behandeln soll. Das Tier hat Fieber und die Milchbildung ist stark zurückgegangen. Frau Huf-Schmidt sieht auf dem Hof weitere Kühe, die stark husten. Der Landwirt sagt, das sei halt das Wetter. Sie solle lediglich der einen Kuh wieder zur üblichen Milchleistung verhelfen. Unter den aktuellen ökonomischen Zwängen könne er nicht für jedes Wehwehchen eine tierärztliche Behandlung veranlassen.

Bitte wählen Sie die zutreffende Antwort für jeden Punkt aus:

[illegible]

|                                                                                                                                                                                                                                                    |   |   |   |   |   |   |   |   |   |
|----------------------------------------------------------------------------------------------------------------------------------------------------------------------------------------------------------------------------------------------------|---|---|---|---|---|---|---|---|---|
| Patientinnenbesitzer*innen sollten nicht infrage gestellt werden. Frau Dr. Huf-Schmidt behandelt also nur die eine Kuh.                                                                                                                            |   |   |   |   |   |   |   |   |   |
| Die ökonomischen Zwänge müssen berücksichtigt werden. Frau Dr. Huf-Schmidt bietet daher dem Landwirt einen „Mengenrabatt“ bei der Behandlung der anderen Kühe an.                                                                                  | O | O | O | O | O | O | O | O | O |
| Die richtige Kommunikation ist entscheidend. Frau Dr. Huf-Schmidt legt ausführlich die Argumente dar, die für die Behandlung aller Tiere sprechen, gibt aber nach, falls der Landwirt doch nicht einwilligt, um ihn als Kunden nicht zu verlieren. | O | O | O | O | O | O | O | O | O |

### Skalen Fall 2

Bitte denken Sie zurück an den zweiten Fall:

Eine Frau kommt mit ihrer 8-jährigen Tochter und deren Meerschweinchen in die Tierklinik. Das Tier leidet an einer behandelbaren Krankheit, aber die zeitaufwändige Therapie würde etwa 200€ kosten. Die Frau sagt, sie möchte die Kosten nicht übernehmen, und bittet darum, das Tier zu euthanasieren. Sie will ihrer Tochter für 25€ ein neues Meerschweinchen kaufen. Die Tochter ist sichtlich aufgelöst. Das Meerschweinchen leidet an starken Schmerzen und es besteht akuter Handlungsbedarf.

Bitte wählen Sie die zutreffende Antwort für jeden Punkt aus:

[illegible]

|                                                                                                                                                                                                                   |                       |                       |                       |                       |                       |                       |                       |                       |                       |
|-------------------------------------------------------------------------------------------------------------------------------------------------------------------------------------------------------------------|-----------------------|-----------------------|-----------------------|-----------------------|-----------------------|-----------------------|-----------------------|-----------------------|-----------------------|
| Das Wohl des Meerschweinchens geht vor. Der Tierarzt sollte das Tier in Obhut nehmen und behandeln, ohne die Kosten der PB anzurechnen. Anschließend soll es über einen Tierschutzverein weitervermittelt werden. | <input type="radio"/> |
| Es sollte möglich sein, die PB mit Argumenten zu überzeugen. Der Tierarzt sollte es mit einem Gespräch versuchen, und nur nachgeben, falls sie sich nicht überzeugen lässt.                                       | <input type="radio"/> |
| Es müssen alle Bedürfnisse berücksichtigt werden. Der Tierarzt sollte deshalb der Tochter erklären, dass er ausnahmsweise das Meerschweinchen kostenlos behandeln werde, wenn die Mutter nicht bezahlen will.     | <input type="radio"/> |

### Skalen Fall 3

Bitte denken Sie an den dritten Fall zurück:

Tierarzt Dr. Knecht-Weber wird zu einem Springpferd gerufen, das am linken Vorderbein lahmt. Nach eingehender Untersuchung ordnet er eine Behandlung und Schonung an. Der Besitzer erklärt, dass das Pferd in zwei Tagen bei einem Wettkampf

antreten soll, und fordert ihn auf, die Lahmheit mit der Gabe eines Analgetikums zu unterdrücken. Auf den Hinweis, dass eine Wettkampfbelastung unter diesen Bedingungen zu einem bleibenden Sehnenschaden führen könnte, entgegnet er, das Pferd habe eine gute Lebensversicherung.

Bitte wählen Sie die zutreffende Antwort für jeden Punkt aus:

[illegible]

|                                                                                                                                                                                                                                                                    |                       |                       |                       |                       |                       |                       |                       |                       |                       |
|--------------------------------------------------------------------------------------------------------------------------------------------------------------------------------------------------------------------------------------------------------------------|-----------------------|-----------------------|-----------------------|-----------------------|-----------------------|-----------------------|-----------------------|-----------------------|-----------------------|
| Das (ökonomische und Prestige-) Interesse des PB an der Wettkampfteilnahme ist nachvollziehbar. Dr. Weber- Knecht spricht mit dem Besitzer ab, dass dies eine einmalige Ausnahme für den wichtigen Wettkampf sei und verabreicht das Analgetikum                   | <input type="radio"/> |
| Die vom PB geforderte Maßnahme verstößt gegen das Tierschutzgesetz. Dr. Knecht- Weber klärt den Besitzer über seine Pflichten gegenüber dem Tier auf und droht mit einer Anzeige beim zuständigen Veterinäramt, sollte er das Pferd beim Wettkampf starten lassen. | <input type="radio"/> |

### *Sonstige Angaben*

Wir möchten Sie abschließend um folgende Angaben bitten:

Wie lautet Ihre Matrikelnummer?\*

Welche der folgenden Lehrveranstaltungen haben Sie besucht?

Bitte wählen Sie die zutreffenden Antworten aus:

- ☐ Vorlesung: Ethik für die Klinik
- ☐ Vorlesung: Ethische Themen in Studium und Praxis der Tiermedizin
- ☐ Seminar: Ethik in der Rinderpraxis
- ☐ Seminar: Ethik in der Pferdepraxis



- Seminar: P-E-P: Kleintierpraxis
- Seminar: P-E-P: Pferdepraxis
- Seminar: P-E-P: Amtstierärzte
- Seminar: P-E-P: Schweinepraxis
- Seminar: Euthanasie in der Tiermedizin
- Seminar: Verantwortung im amtstierärztlichen Dienst
- Seminar: Tierärztliches Berufsethos: Grundlagen und Anwendungen
- Seminar: Landwirtschaftliches Praktikum auf dem LFG Ruthe
- Sonstiges: \_\_\_\_\_
