# Supplementary material for: Assessing Moral Judgements in Veterinary Students: An Exploratory Mixed-Methods Study from Germany
Source: MDPI journal article supplement (doi:10.3390/ani12050586), 2022-02-25
Supplement: s1 [file s1]

### O1 Autonomy PO

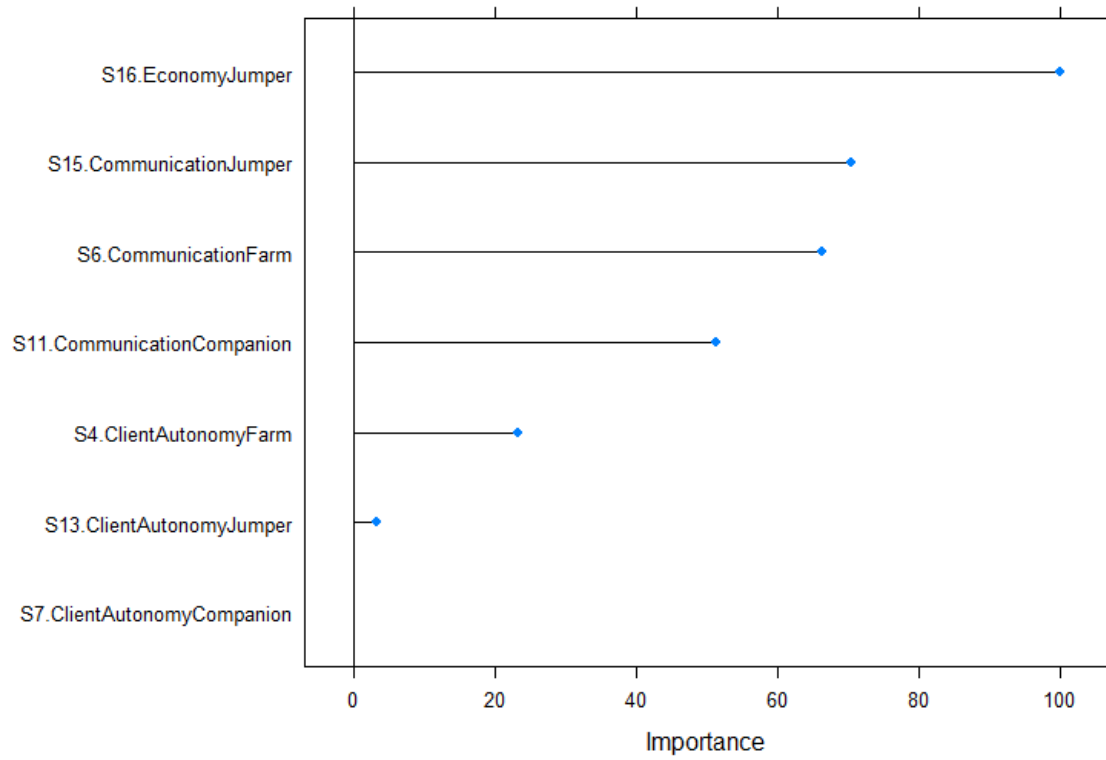

### Finances PO O2

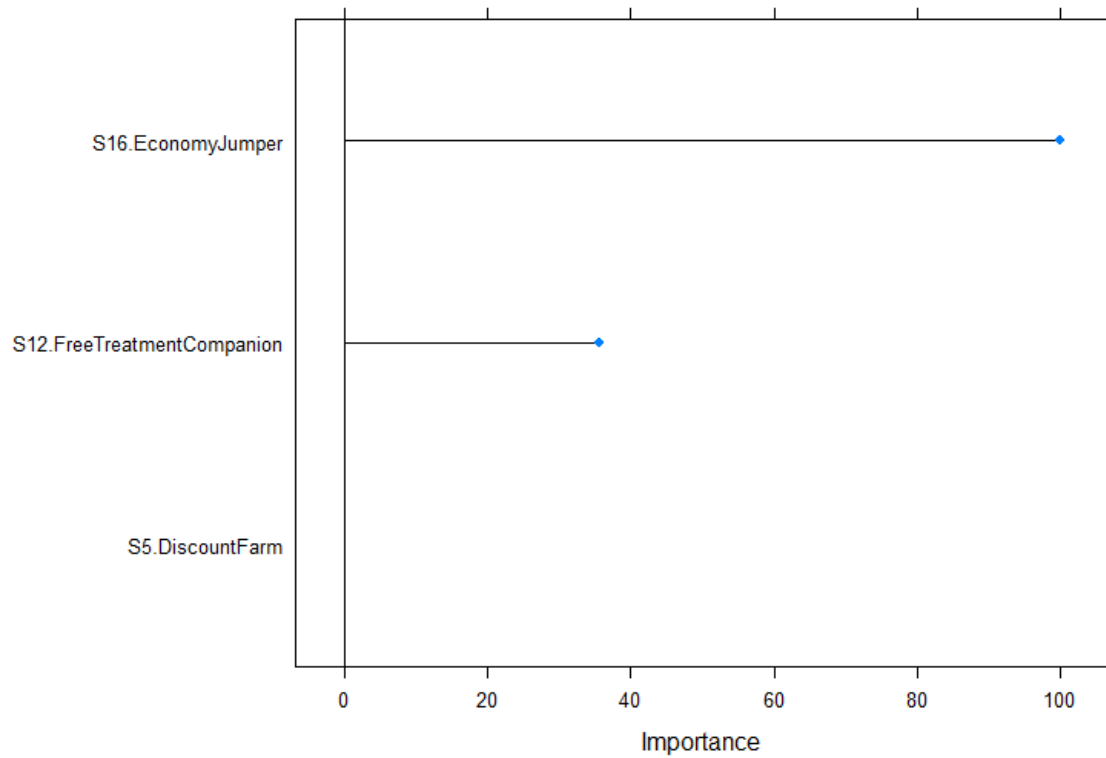

### Patient quality of life O3

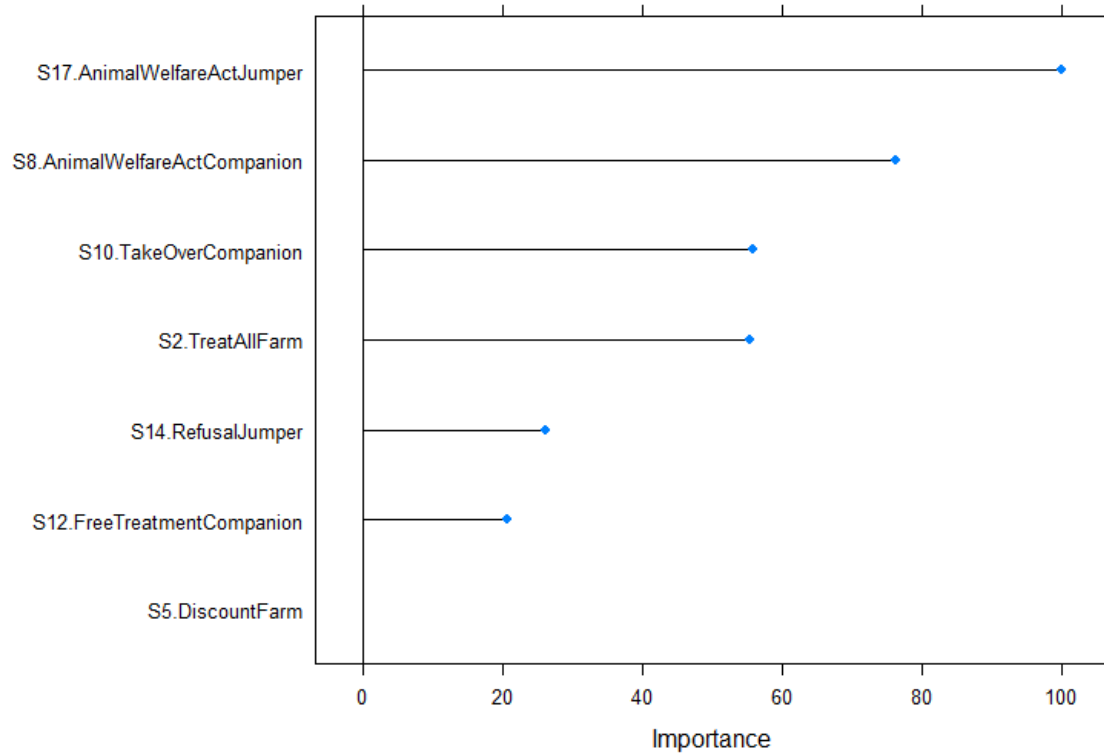

### Attitude O4

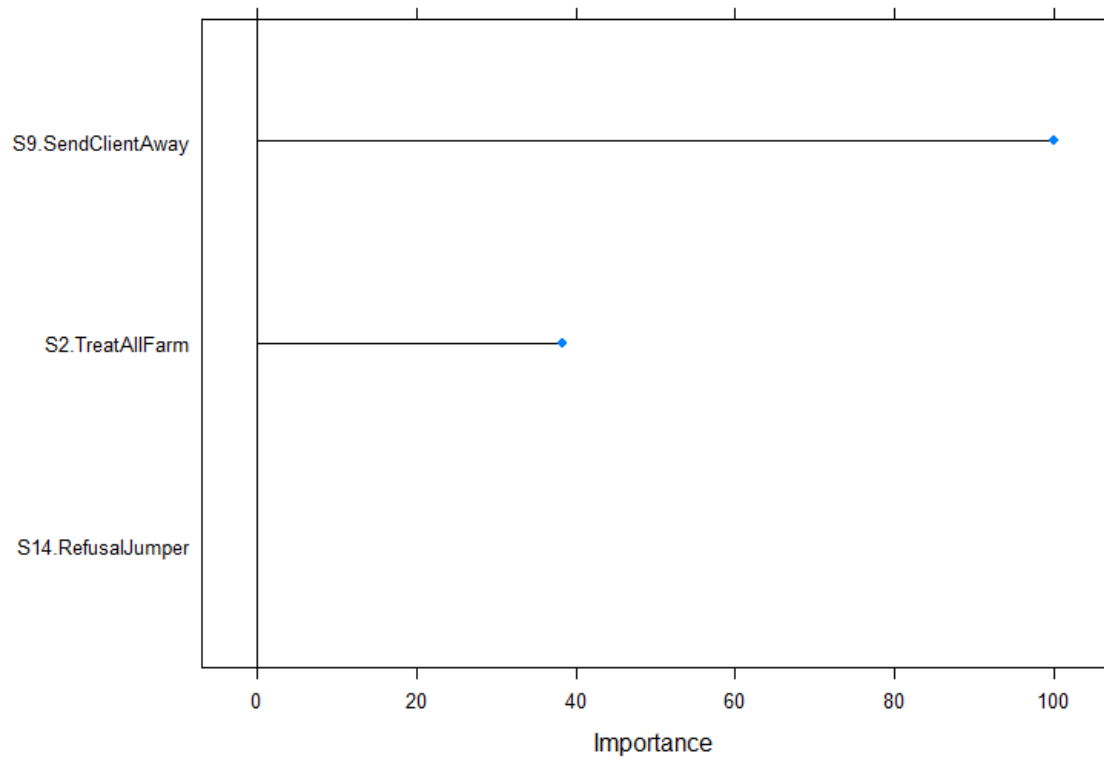

### Finances Vet O5

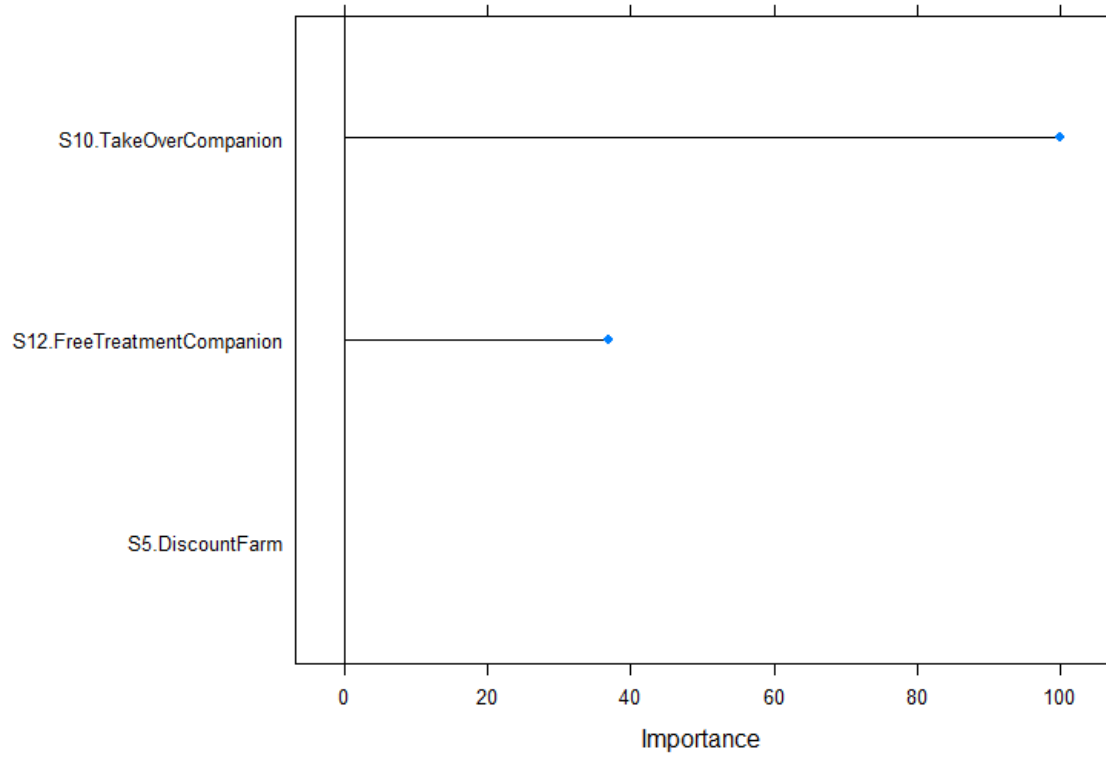

### Communication O6

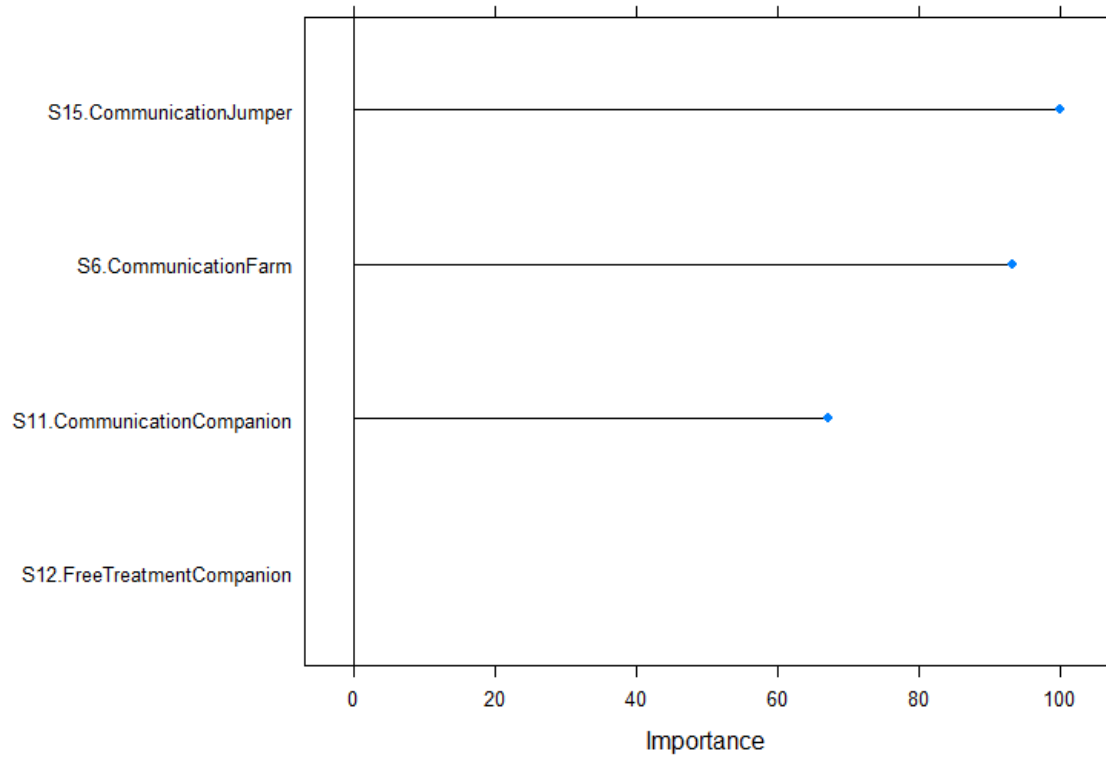

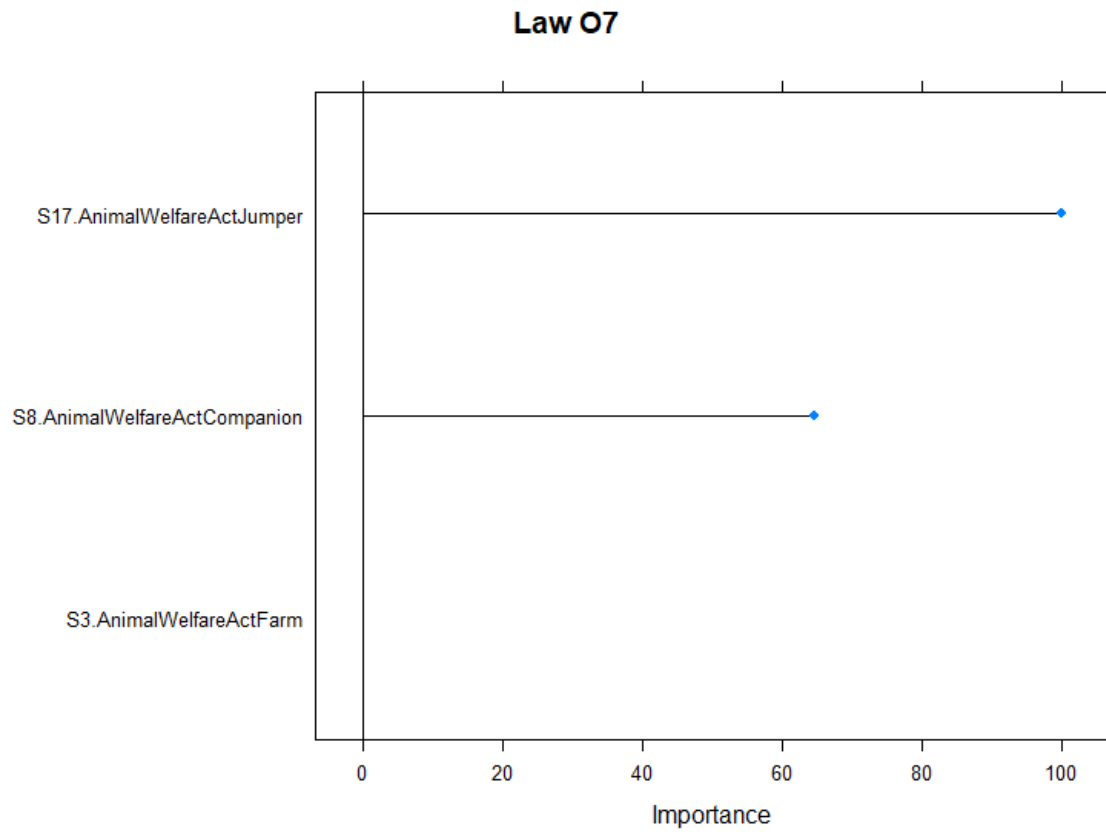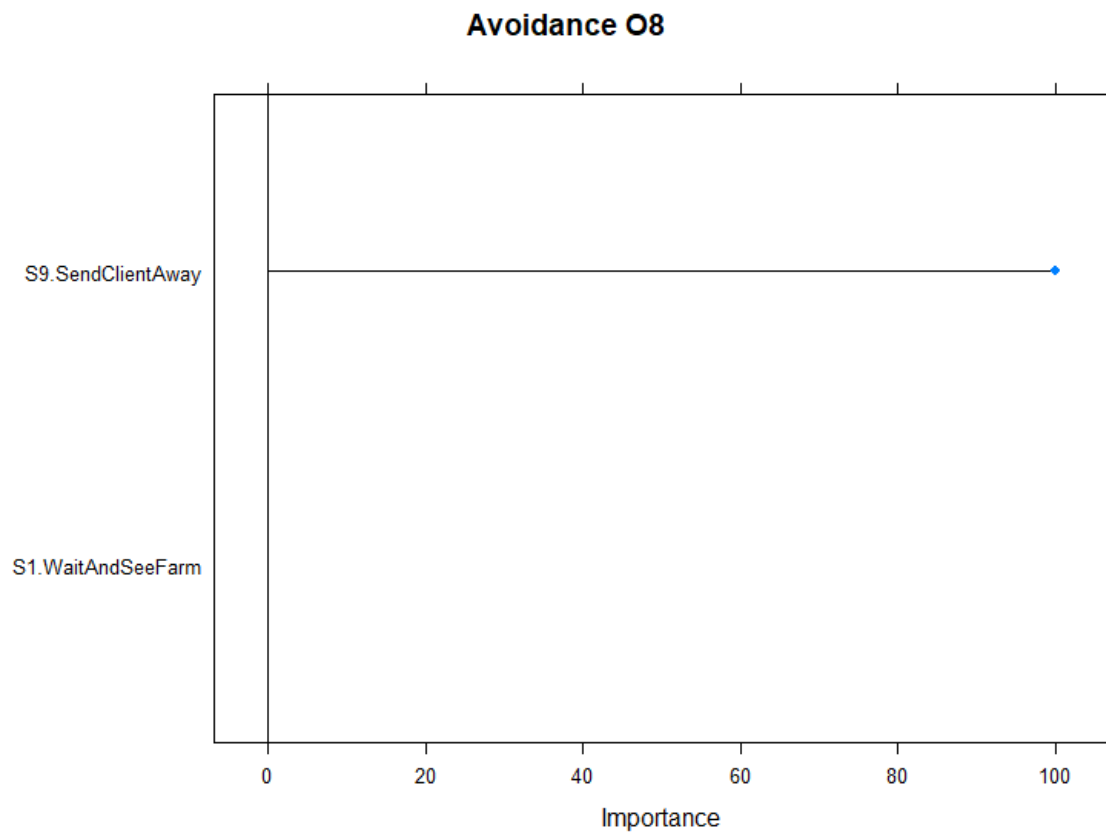

**Figure S1.** portance plots resulting from the LVQ (Learning Vector Quantisation) models.

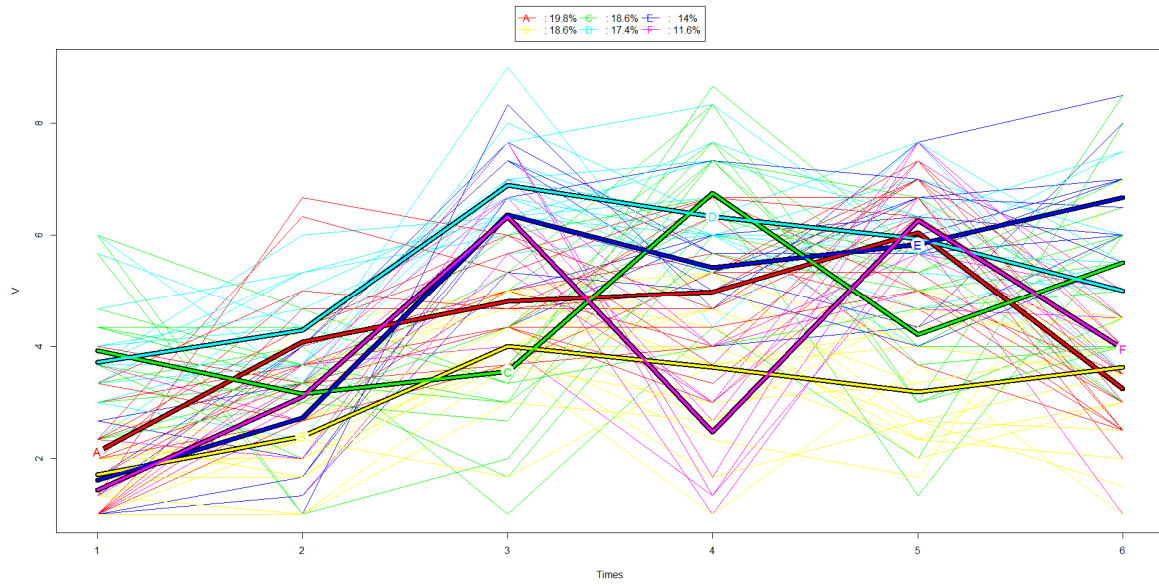

**Figure S2.** Each Likert scale was included only once in the k-means analysis.
